# Supplementary material
Source: publisher site journal article supplement (https://www.spandidos-publications.com/1808/downloadSupplementary)
Supplement: Supplementary file 1 [file downloadSupplementary]

## Sheet: Sheet1
Table SIV. Kyoto Encyclopedia of Genes and Genomespathway enrichment analysis of Module 1.
Term	Count	%	P-value	Genes	List Total	Pop Hits	Pop Total	Fold enrichment	Bonferroni	Benjamini
hsa04110:Cell cycle	5	22.7273	1.46767e-06	CCNB1, CDK1, TTK, BUB1B, CDC20	7	124	6879	39.6256	2.05472e-05	2.05472e-05
hsa04115:p53 signaling pathway	3	13.6364	0.00136695	CCNB1, CDK1, RRM2	7	67	6879	44.0021	0.0189682	0.00952951
hsa04114:Oocyte meiosis	3	13.6364	0.00371022	CCNB1, CDK1, CDC20	7	111	6879	26.5598	0.0507088	0.017197
hsa04914:Progesterone-mediated oocyte maturation	2	9.09091	0.0735498	CCNB1, CDK1	7	87	6879	22.5911	0.65683	0.23462

## Sheet: Sheet2
Category	Term	Count	%	PValue	Genes	List Total	Pop Hits	Pop Total	Fold Enrichment	Bonferroni	Benjamini	FDR
KEGG_PATHWAY	hsa04110:Cell cycle	5	22.7273	1.46767e-06	CCNB1, CDK1, TTK, BUB1B, CDC20	7	124	6879	39.6256	2.05472e-05	2.05472e-05	0.000996973
KEGG_PATHWAY	hsa04115:p53 signaling pathway	3	13.6364	0.00136695	CCNB1, CDK1, RRM2	7	67	6879	44.0021	0.0189682	0.00952951	0.924889
KEGG_PATHWAY	hsa04114:Oocyte meiosis	3	13.6364	0.00371022	CCNB1, CDK1, CDC20	7	111	6879	26.5598	0.0507088	0.017197	2.49339
KEGG_PATHWAY	hsa04914:Progesterone-mediated oocyte maturation	2	9.09091	0.0735498	CCNB1, CDK1	7	87	6879	22.5911	0.65683	0.23462	40.4851
